# Supplementary material
Source: HighWire-hosted journal article supplement (https://bmjopen.bmj.com/content/10/7/e035030)
Supplement: inline-supplementary-material-2 [file inline-supplementary-material-2.pdf]

**Supplementary Table:** Means and beta-coefficients (95% CI) from multivariate analyses of seeking care, asking for and trusting health information for first contact practitioners, medical practitioners and other sources. Only significant univariate associations were included in the multivariate model. Income is reported as Australian dollars (AU\$).

| Variable                                             | Number of responses | Seek care from   |                    |        | Asking/sourcing health information <sup>a</sup> |                   |        | Trusting health information <sup>a</sup> |                    |        |
|------------------------------------------------------|---------------------|------------------|--------------------|--------|-------------------------------------------------|-------------------|--------|------------------------------------------|--------------------|--------|
|                                                      |                     | Mean (95% CI) /5 | Beta (95% CI)      | Sig    | Mean (95% CI) /5                                | Beta (95% CI)     | Sig    | Mean (95% CI) /5                         | Beta (95% CI)      | Sig    |
| First contact practitioner (total respondents = 764) |                     |                  |                    |        |                                                 |                   |        |                                          |                    |        |
| Practitioner (total)                                 | 764                 |                  |                    | <0.001 |                                                 |                   | <0.001 |                                          |                    | <0.001 |
| GP                                                   | 692                 | 3.5 (3.4, 3.6)   | Referent           |        | 3.6 (3.5, 3.7)                                  | Referent          |        | 3.9 (3.8, 4.0)                           | Referent           |        |
| Physiotherapist                                      | 655                 | 3.8 (3.7, 3.9)   | 0.35 (0.2, 0.5)    |        | 3.9 (3.8, 4.0)                                  | 0.3 (0.1, 0.5)    |        | 4.3 (4.2, 4.4)                           | 0.3 (0.2, 0.4)     |        |
| Podiatrist                                           | 553                 | 2.3 (2.2, 2.4)   | -1.1 (-1.3, -0.9)  |        | 2.3 (2.2, 2.4)                                  | -1.2 (-1.3, -1.1) |        | 3.75 (3.6, 3.9)                          | -0.2 (-0.3, 0.1)   |        |
| Exercise Physiologist                                | 486                 | 2.3 (2.2, 2.4)   | -1.1 (-1.3, -0.9)  |        | 2.5 (2.3, 2.7)                                  | -1.1 (-1.3, -0.9) |        | 3.8 (3.6, 4.0)                           | -0.2 (-0.3, -0.1)  |        |
| Osteopath                                            | 517                 | 1.9 (1.8, 2.0)   | -1.5 (-1.7, -1.3)  |        | 1.9 (1.8, 2.0)                                  | -1.6 (-1.7, -1.5) |        | 3.6 (3.4, 3.8)                           | -0.35 (-0.5, -0.2) |        |
| Chiropractor                                         | 527                 | 2.0 (1.8, 2.2)   | -1.45 (-1.6, -1.3) |        | 2.1 (1.9, 2.3)                                  | -1.5 (-1.7, -1.3) |        | 3.75 (3.6, 3.9)                          | -0.2 (-0.4, 0.6)   |        |
| Naturopaths                                          | 484                 | 1.5 (1.4, 1.6)   | -1.9 (-2.0, -1.8)  |        | 1.5 (1.4, 1.6)                                  | -2.0 (-2.1, -1.9) |        | 3.2 (3.0, 3.4)                           | -0.8 (-1.0, -0.6)  |        |
| Covariates                                           |                     |                  |                    |        |                                                 |                   |        |                                          |                    |        |
| Gender                                               |                     |                  |                    | 0.001  |                                                 |                   | 0.015  |                                          |                    | 0.121  |

|                     |                 |                   |                 |                   |                 |                    |       |
|---------------------|-----------------|-------------------|-----------------|-------------------|-----------------|--------------------|-------|
| Male                | 2.4 (2.3, 2.5)  | Referent          | 2.5 (2.4, 2.6)  | Referent          | 3.7 (3.6, 3.8)  | Referent           |       |
| Female              | 2.6 (2.5, 2.7)  | 0.2 (0.1, 0.3)    | 2.6 (2.5, 2.7)  | 0.2 (0.1, 0.3)    | 3.8 (3.7, 3.9)  | 0.1 (-0.0, 0.2)    |       |
| Age (Continuous)    |                 | 0.07 (0.04, 0.1)  | 0.016           | 0.0 (-0.01, 0.01) | 0.728           | 0.0 (-0.05, -0.05) | 0.117 |
| Income              |                 |                   | 0.091           |                   | 0.129           |                    | 0.029 |
| <15000              | 2.5 (2.3, 2.7)  | Referent          | 2.5 (2.3, 2.7)  | Referent          | 3.9 (3.7, 4.1)  | Referent           |       |
| 15000-30000         | 2.5 (2.4, 2.6)  | 0.0 (-0.3, 0.3)   | 2.7 (2.5, 2.9)  | 0.2 (-0.1, 0.3)   | 3.65 (3.5, 3.8) | -0.3 (-0.5, -0.1)  |       |
| 31000-50000         | 2.5 (2.4, 2.6)  | 0.0 (-0.3, 0.3)   | 2.6 (2.4, 2.8)  | 0.1 (-0.2, 0.4)   | 3.75 (3.6, 3.9) | -0.2 (-0.4, 0.0)   |       |
| 51000->100000       | 2.4 (2.3, 2.5)  | -0.15 (-0.4, 0.1) | 2.4 (2.3, 2.5)  | 0.0 (-0.2, 0.2)   | 3.7 (3.5, 3.9)  | -0.3 (-0.5, -0.1)  |       |
| Living Location     |                 |                   | 0.427           | -                 | -               | -                  | -     |
| Capital City        | 2.55 (2.4, 2.7) | Referent          | -               | -                 | -               | -                  | -     |
| Metropolitan centre | 2.45 (2.3, 2.6) | 0.0 (-0.1, 0.1)   | -               | -                 | -               | -                  | -     |
| Regional/rural      | 2.4 (2.3, 2.5)  | 0.1 (-0.1, 0.3)   | -               | -                 | -               | -                  | -     |
| Education           |                 |                   | 0.235           |                   | 0.032           |                    | 0.262 |
| Year 12 or below    | 2.45 (2.3, 2.6) | Referent          | 2.6 (2.4, 2.7)  | Referent          | 3.8 (3.6, 4.0)  | Referent           |       |
| Certificate III-IV  | 2.6 (2.4, 2.8)  | 0.1 (-0.2, 0.4)   | 2.6 (2.4, 2.8)  | 0.0 (-0.3, 0.3)   | 3.7 (3.5, 3.9)  | -0.1 (-0.4, 0.2)   |       |
| Diploma             | 2.6 (2.4, 2.8)  | 0.1 (-0.1, 0.3)   | 2.7 (2.5, 2.9)  | 0.1 (-0.1, 0.3)   | 3.85 (3.7, 4.0) | 0.1 (-0.1, 0.3)    |       |
| Bachelor degree     | 2.4 (2.3, 2.5)  | 0.0 (-0.2, 0.2)   | 2.4 (2.3, 2.5)  | -0.1 (-0.3, 0.1)  | 3.7 (3.6, 3.8)  | -0.1 (-0.3, 0.1)   |       |
| Postgraduate degree | 2.45 (2.3, 2.6) | 0.0 (-0.2, 0.2)   | 2.45 (2.3, 2.6) | -0.1 (-0.3, 0.1)  | 3.75 (3.6, 3.9) | -0.1 (-0.3, 0.1)   |       |

Medical Practitioner (total respondents = 760)

|                     |     |                 |                   |        |                 |                   |        |                 |                   |        |
|---------------------|-----|-----------------|-------------------|--------|-----------------|-------------------|--------|-----------------|-------------------|--------|
| GP                  | 692 | 3.45 (3.3, 3.6) | Referent          | <0.001 | 3.5 (3.4, 3.6)  | -0.7 (-0.9, -0.5) | <0.001 | 3.9 (3.8, 4.0)  | Referent          | <0.01  |
| Orthopaedic Surgeon | 616 | 2.8 (2.7, 2.9)  | 0.7 (-0.8, 0.6)   |        | 2.85 (2.7, 3.0) | -0.7 (-0.8, 0.6)  |        | 4.25 (4.1, 4.4) | 0.3 (0.2, 0.4)    |        |
| Sports Physician    | 574 | 2.75 (2.6, 2.9) | -0.7 (-0.9, -0.5) |        | 2.8 (2.7, 2.9)  | -0.7 (-0.9, 0.5)  |        | 4.1 (3.9, 4.3)  | 0.2 (0.1, 0.3)    |        |
| Rheumatologist      | 551 | 1.95 (1.8, 2.1) | -1.5 (-1.6, -1.4) |        | 2.0 (1.9, 2.1)  | -1.5 (-1.6, -1.4) |        | 3.95 (3.8, 4.1) | 0.05 (-0.1, 0.2)  |        |
| Covariates          |     |                 |                   |        |                 |                   |        |                 |                   |        |
| Gender              |     | -               | -                 | -      |                 | -                 | -      |                 |                   | -      |
| Male                |     | -               | -                 | -      |                 | -                 | -      |                 | -                 | -      |
| Female              |     | -               | -                 | -      |                 | -                 | -      |                 | -                 | -      |
| Age (Continuous)    |     |                 | 0.15 (0.1, 0.2)   | <0.001 |                 | 0.15 (0.1,0.2)    | <0.001 |                 | 0.05 (0.0, 0.1)   | <0.001 |
| Income              |     |                 |                   | 0.386  | -               | -                 | -      |                 |                   | 0.005  |
| <15000              |     | 2.7 (2.5, 2.9)  | Referent          | -      | -               | -                 | -      | 4.3 (4.1, 4.5)  | Referent          |        |
| 15000-30000         |     | 2.8 (2.6, 3.0)  | 0.1 (-0.2, 0.4)   | -      | -               | -                 | -      | 3.9 (3.7, 4.1)  | -0.4 (-0.6, -0.2) |        |
| 31000-50000         |     | 2.8 (2.6, 3.0)  | 0.1 (-0.2, 0.4)   | -      | -               | -                 | -      | 4.1 (3.9, 4.3)  | -0.2 (-0.4, 0.0)  |        |
| 51000->100000       |     | 2.6 (2.5, 2.7)  | -0.05 (-0.3, 0.2) | -      | -               | -                 | -      | 4.0 (3.9, 4.1)  | -0.3 (-0.5, -0.1) |        |
| Living Location     |     |                 | -                 | -      |                 | -                 | -      |                 | -                 | -      |
| Capital City        |     | -               | -                 | -      | -               | -                 | -      | -               | -                 | -      |

|                                                            |                 |                  |       |                   |                  |                   |        |                 |                   |
|------------------------------------------------------------|-----------------|------------------|-------|-------------------|------------------|-------------------|--------|-----------------|-------------------|
| Metropolitan centre                                        | -               | -                | -     | -                 | -                | -                 | -      | -               | -                 |
| Regional/rural                                             | -               | -                | -     | -                 | -                | -                 | -      | -               | -                 |
| Education                                                  |                 |                  | 0.965 |                   |                  | 0.707             | -      | -               | -                 |
| Year 12 or below                                           | 2.8 (2.6, 3.0)  | Referent         |       | 2.9 (2.7, 3.1)    | Referent         |                   |        | -               | -                 |
| Certificate III-IV                                         | 2.75 (2.5, 3.0) | 0.1 (-0.2, 0.4)  |       | 2.85 (2.55, 3.15) | -0.1 (-0.4, 0.2) |                   | -      | -               | -                 |
| Diploma                                                    | 2.7 (2.5, 2.9)  | 0.1 (-0.2, 0.4)  |       | 2.8 (2.6, 3.0)    | -0.1 (-0.4, 0.2) |                   | -      | -               | -                 |
| Bachelor degree                                            | 2.7 (2.5, 2.9)  | -0.1 (-0.3, 0.1) |       | 2.7 (2.5, 2.9)    | -0.2 (-0.5, 0.1) |                   | -      | -               | -                 |
| Postgraduate degree                                        | 2.75 (2.6, 2.9) | 0.0 (-0.2, 0.2)  |       | 2.8 (2.6, 3.0)    | -0.1 (-0.4, 0.2) |                   | -      | -               | -                 |
| <b>Other Sources<sup>b</sup> (total respondents = 764)</b> |                 |                  |       |                   |                  |                   |        |                 |                   |
| Source                                                     |                 |                  |       |                   |                  |                   | <0.001 |                 | <0.001            |
| GP                                                         | 692             | -                | -     | -                 | 3.5 (3.4, 3.6)   | Referent          |        | 3.9 (3.8, 4.0)  | Referent          |
| Expert website                                             | 636             | -                | -     | -                 | 3.6 (3.5, 3.7)   | 0.05 (-0.1, 0.2)  |        | 3.5 (3.4, 3.5)  | -0.5 (-0.6, -0.4) |
| Health App                                                 | 602             | -                | -     | -                 | 2.4 (2.3, 2.5)   | -1.2 (-1.3, -1.1) |        | 2.8 (2.7, 2.9)  | -1.2 (-1.3, -1.1) |
| Wikipedia                                                  | 589             | -                | -     | -                 | 2.1 (2.0, 2.2)   | -1.4 (-1.6, -1.2) |        | 2.4 (2.3, 2.5)  | -1.5 (-1.6, -1.4) |
| Google scholar                                             | 645             | -                | -     | -                 | 3.45 (3.3, 3.6)  | -1.1 (-1.3, -0.9) |        | 3.2 (3.1, 3.3)  | -0.7 (-0.9, -0.5) |
| Internet search                                            | 546             | -                | -     | -                 | 3.3 (3.2, 3.4)   | -0.3 (-0.4, -1.2) |        | 2.6 (2.5, 2.7)  | -1.4 (-1.5, -1.3) |
| Social media                                               | 535             | -                | -     | -                 | 1.5 (1.4, 1.6)   | -2.0 (-2.1, -1.9) |        | 2.05 (1.9, 2.2) | -1.9 (-2.0, -1.8) |
| Mainstream media                                           | 522             | -                | -     | -                 | 1.65 (1.6, 1.7)  | -1.9 (-2.0, -1.8) |        | 2.3 (2.2, 2.4)  | -1.7 (-1.8, -1.6) |

|                   |     |   |   |   |                |                     |                |                   |
|-------------------|-----|---|---|---|----------------|---------------------|----------------|-------------------|
| Podcast           | 518 | - | - | - | 1.7 (1.6, 1.8) | -1.85 (-2.0, -1.75) | 2.6 (2.5, 2.7) | -1.3 (-1.5, -1.2) |
| Friend/Family     | 600 | - | - | - | 2.6 (2.5, 2.7) | -0.9 (-1.0, -0.8)   | 2.9 (2.8, 3.0) | -1.0 (-1.1, -0.9) |
| Telephone hotline | 526 | - | - | - | 1.9 (1.8, 2.0) | -1.7 (-1.8, -1.6)   | 2.5 (3.4, 3.6) | -0.8 (-0.9, -0.7) |

<sup>a</sup> adjusted for interest level in health information

<sup>b</sup> No demographic variable included in model as none were significantly associated on a univariate level. Access other sources: Sex  $X^2=0.34$ ,  $p=0.557$ ; Age  $X^2=0.07$ ,  $p=0.785$ ; Income  $X^2=1.5$ ,  $p=0.682$ ; Insurance  $X^2=0.29$ ,  $p=0.593$ ; Residence  $X^2=0.01$ ,  $p=0.995$ ; Language  $X^2=0.68$ ,  $p=0.409$ ; Education  $X^2=0.53$ ,  $p=0.971$ . Trust other sources: Sex  $X^2=0.28$ ,  $p=0.595$ ; Age  $X^2=2.75$ ,  $p=0.097$ ; Income  $X^2=4.29$ ,  $p=0.232$ , Insurance  $X^2=0.03$ ,  $p=0.854$ ; Residence  $X^2=2.37$ ,  $p=0.306$ ; Language  $X^2=1.28$ ,  $p=0.258$ ; Education  $X^2=7.93$ ,  $p=0.094$ .
